# Supplementary material
Source: PubMed Central journal article supplement (PMC6597274)

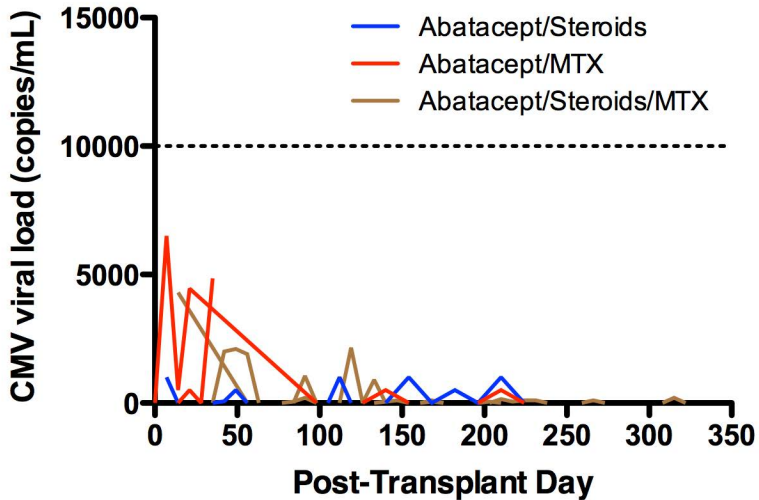

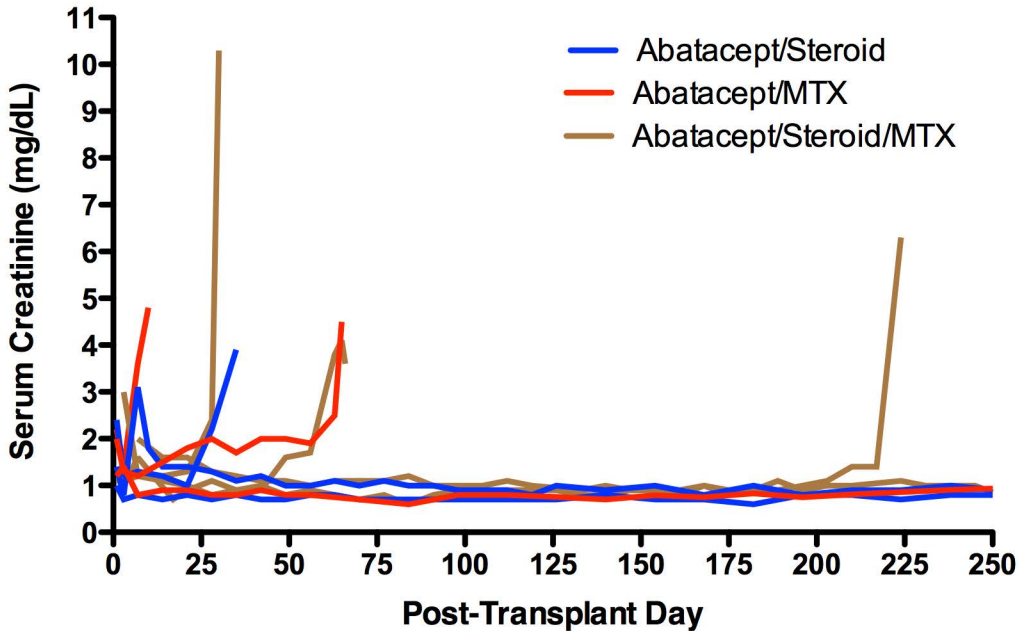

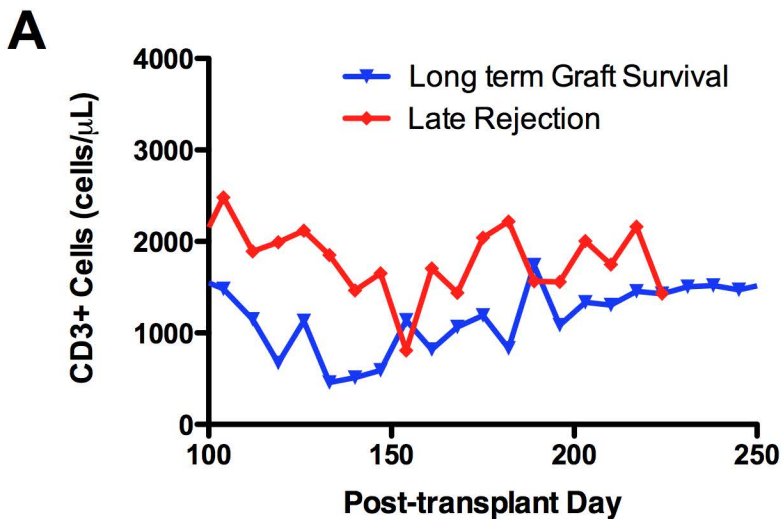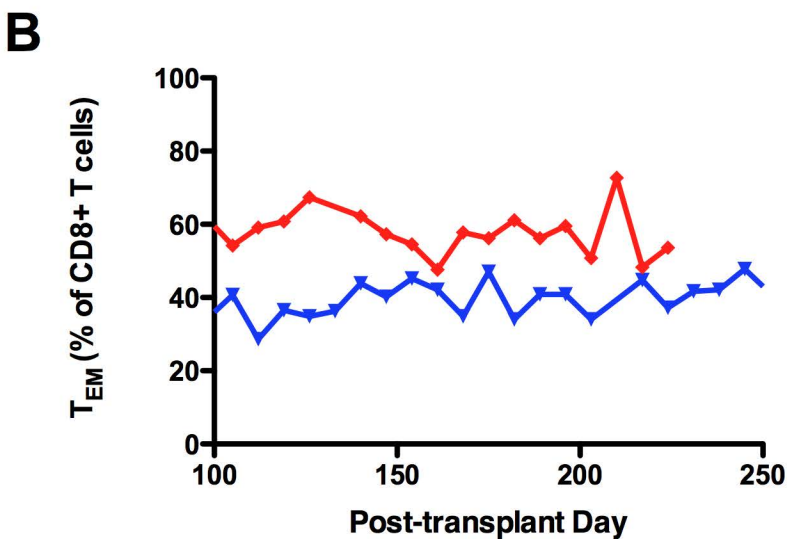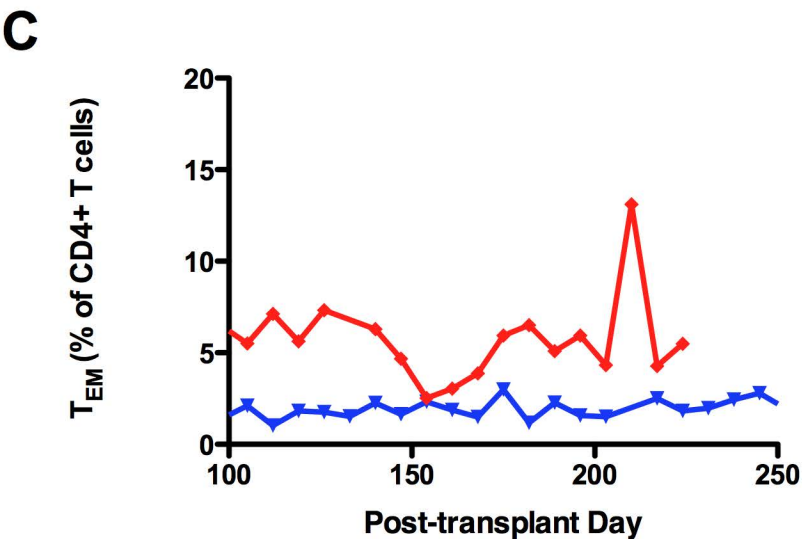

Supplement: NIHMS1024837-supplement-Supp_figS1-3.pdf [file NIHMS1024837-supplement-Supp_figS1-3.pdf]
